# Supplementary material
Source: ML conference proceedings conference paper supplement (https://openaccess.thecvf.com/content/CVPR2026/html/Tan_DarkAct_A_RGB-Thermal_CVPR_2026_paper.html)

# DarkAct: A RGB-Thermal Dataset and Fusion Framework for Multimodal Low-Light Action Recognition

## Supplementary Material

### 7. Technical Details of DarkAct-Net

We provide additional technical details of DarkAct-Net that were omitted from the main manuscript due to space limitations. Please refer to Figure 3 of the main manuscript for better clarity.

#### 7.1. Modal Embedding

The Modal Embedding module processes raw RGB or thermal video inputs and extracts modality-specific spatiotemporal features for downstream processing. Given an input video tensor  $X \in \mathbb{R}^{T \times C \times H \times W}$ , where  $T$  denotes the number of frames,  $C$  is the channel dimension ( $C = 3$  for RGB and  $C = 1$  for thermal), and  $H, W$  denote spatial resolution, we apply three parallel convolutional branches with different receptive fields:

$$\begin{aligned} F_1 &= \text{Conv}_{3 \times 3}^{\text{ReLU+BN}}(X), \\ F_2 &= \text{Conv}_{5 \times 5}^{\text{ReLU+BN}}(X), \\ F_3 &= \text{Conv}_{7 \times 7}^{\text{ReLU+BN}}(X), \end{aligned}$$

These branches capture complementary multi-scale spatial cues. We then construct two pairwise concatenations:

$$\begin{aligned} F_{cat}^1 &= [F_1; F_2] \in \mathbb{R}^{T \times 2C \times H \times W}, \\ F_{cat}^2 &= [F_2; F_3] \in \mathbb{R}^{T \times 2C \times H \times W}. \end{aligned}$$

where  $[\cdot; \cdot]$  denotes channel-wise concatenation.

Afterwards, each concatenated feature tensor is fed into a lightweight MLP-style refinement block consisting of a  $3 \times 3$  convolution with Sigmoid activation, followed by a dilated  $7 \times 7$  convolution with ReLU activation and batch normalization. Formally,

$$\begin{aligned} F^1 &= \text{DilConv}_{7 \times 7}^{\text{ReLU+BN}}(\sigma(\text{Conv}_{3 \times 3}(F_{cat}^1))), \\ F^2 &= \text{DilConv}_{7 \times 7}^{\text{ReLU+BN}}(\sigma(\text{Conv}_{3 \times 3}(F_{cat}^2))), \end{aligned}$$

where  $\sigma(\cdot)$  denotes the Sigmoid activation.

The resulting multi-scale features are aggregated via channel concatenation:

$$F_{\text{multi}} = [F^1; F^2] \in \mathbb{R}^{T \times 2C \times H \times W},$$

A  $1 \times 1$  convolution with ReLU+BN is applied to fuse the features and reduce the channel dimension:

$$F_{\text{refined}} = \text{Conv}_{1 \times 1}^{\text{ReLU+BN}}(F_{\text{multi}}) \in \mathbb{R}^{T \times C \times H \times W}$$

To incorporate temporal ordering and modality-aware contextual cues, we introduce a learnable spatiotemporal positional embedding:  $P \in \mathbb{R}^{T \times C \times H \times W}$ . The final modality-specific representation is obtained via element-wise addition:

$$G = F_{\text{refined}} + P,$$

where  $G \in \mathbb{R}^{T \times C \times H \times W}$ .

This representation integrates multi-scale spatial cues, temporal positional information, and modality awareness, serving as the unified input to subsequent modules (MAA and LAF) within DarkAct-Net.

#### 7.2. Light-Adaptive Query

The Light-Adaptive Query module produces the query vector defined in Eq. (5) of the main manuscript. It is computed as:

$$F^Q = \text{FC} \left( \text{AP} \left( \text{DilC}_{3, 7 \times 7}^{\text{PReLU}}([Y^r \odot F^r; Y^t \odot F^t]) \right) \right),$$

where the operations are defined as follows:  $F^r \in \mathbb{R}^{C \times H \times W}$  and  $F^t \in \mathbb{R}^{C \times H \times W}$  are the RGB and thermal features produced at each Transformer stage;  $Y^r$  and  $Y^t$  are the outputs of the MAA module for RGB and thermal modalities, respectively. Both are processed by a down-sampling convolution to match the spatial resolution of  $F^r$  and  $F^t$ ;  $\odot$  denotes element-wise multiplication, enforcing modality reliability weighting guided by illumination-aware saliency;  $\text{DilC}_{3, 7 \times 7}^P(\cdot)$  is a dilated  $7 \times 7$  convolution with dilation rate 3, followed by a PReLU activation;  $[\cdot; \cdot]$  represents channel-wise concatenation, resulting in a feature of size  $[F^r; F^t] \in \mathbb{R}^{2C \times H \times W}$ ;  $\text{AP}(\cdot)$  denotes global average pooling, reducing the spatial dimensions to produce a compact descriptor in  $\mathbb{R}^{2C}$ ;  $\text{FC}(\cdot)$  is a fully connected layer that maps the pooled feature to  $F^Q \in \mathbb{R}^{C \times N}$ , which serves as the illumination-adaptive query for cross-attention within the LAF module.

### 8. Prompts for Testing VLMs

We adopts following user prompts for testing zero-shot performance of VLMs as shown in Table 3 of the manuscript.

- Single-modal setting for either RGB and thermal: “*There is a video with one person in scene, please analyse the human action in video and choose exactly one action category from the following 27 classes:[calling, climbing stairs, crouching, closing door, opening door, drinking,*

holding umbrella, jumping, lifting, photographing, picking, pouring, pushing, taking off coat, putting on coat, running, searching, sitting, slapping, sleeping, squatting, standing, turning, typing, using smartphone, walking, waving]. Your answer must contain only one category name, without explanations or punctuation”.

- Multimodal setting: “There are RGB and thermal videos, please analyse the human action in these video and choose exactly one action category from the following 27 classes:[calling, climbing stairs, crouching, closing door, opening door, drinking, holding umbrella, jumping, lifting, photographing, picking, pouring, pushing, taking off coat, putting on coat, running, searching, sitting, slapping, sleeping, squatting, standing, turning, typing, using smartphone, walking, waving]. Your answer must contain only one category name, without explanations or punctuation.”

## 9. Additional Experimental Analysis

### 9.1. Class-wise Performance

Table A1 reports the per-class Top-1 and Top-5 accuracies of DarkAct-Net, corresponding to the results summarized in Table 2 of the main manuscript. While DarkAct-Net achieves the best overall performance among all evaluated models, its recognition accuracy exhibits noticeable variation across action categories. This variability arises from several factors: *First*, class imbalance in DarkAct (as described in Section 3.2 of the main manuscript), where frequent actions such as *calling* contain substantially more samples than infrequent ones like *taking off coat*. *Second*, intrinsic difficulty of certain actions under low-light conditions, where subtle or fast motion (e.g., *jumping*, *typing*, *photographing*) leads to weaker appearance cues, especially for small or distant subjects. *Third*, high inter-class similarity, such as between *opening/closing door* or *pushing/picking*, which becomes even more challenging under illumination degradation.

Despite these challenges, DarkAct-Net maintains strong Top-5 accuracy across almost all categories, demonstrating its robustness in capturing motion and cross-modal cues. These observations highlight opportunities for future work, such as class-balanced training strategies, improved temporal modeling, or advanced cross-modal enhancement tailored for low-light environments.

### 9.2. Visualization of MAA Module

To better understand the behavior of the Motion-Aware Attention (MAA) module, we visualize its intermediate representations for paired RGB and thermal videos. Figure A1 presents examples from the DarkAct dataset. For each modality, we show (from left to right): the raw video frame, the computed temporal saliency map, and the motion-

| Classes          | DarkAct-Net |       |
|------------------|-------------|-------|
|                  | Top-1       | Top-5 |
| Calling          | 90.4        | 100.0 |
| Climbing stairs  | 100.0       | 100.0 |
| Crouching        | 79.2        | 96.1  |
| Closing door     | 86.3        | 100.0 |
| Opening door     | 89.9        | 100.0 |
| Drinking         | 55.3        | 71.1  |
| Holding umbrella | 98.2        | 100.0 |
| Jumping          | 39.3        | 60.1  |
| Lifting          | 72.7        | 91.9  |
| Photographing    | 48.1        | 55.8  |
| Picking          | 93.4        | 98.4  |
| Pouring          | 96.6        | 99.0  |
| Pushing          | 66.7        | 91.3  |
| Taking off coat  | 28.6        | 92.0  |
| Putting on coat  | 90.0        | 98.0  |
| Running          | 75.1        | 98.9  |
| Searching        | 95.4        | 98.7  |
| Sitting          | 73.6        | 93.4  |
| Slapping         | 100.0       | 100.0 |
| Sleeping         | 100.0       | 100.0 |
| Squatting        | 85.5        | 99.2  |
| Standing         | 95.7        | 100.0 |
| Turning          | 92.1        | 100.0 |
| Typing           | 49.7        | 61.9  |
| Using smartphone | 97.4        | 100.0 |
| Walking          | 78.2        | 81.9  |
| Waving           | 76.1        | 88.1  |

Table A1. Per-class Top-1 and Top-5 accuracy of DarkAct-Net on the DarkAct test set. The results correspond to the overall performance reported in Table 2 of the main manuscript.

enhanced features  $Y^r$  or  $Y^t$ .

The visualizations reveal that the saliency maps for both modalities successfully highlight foreground human motion, allowing the model to suppress background noise that is common in low-light environments. Due to the inherent sensing differences between RGB and thermal cameras, the saliency maps exhibit distinct patterns: RGB emphasizes texture and edges, while thermal accentuates body heat contours. These differences provide cross-spectral complementarity, enabling the model to capture motion cues that are difficult to observe in one modality alone.

Consequently, the motion-enhanced features  $Y^r$  and  $Y^t$  encode consistent foreground motion while preserving modality-specific strengths. This facilitates more effective fusion in subsequent stages, ultimately leading to improved robustness and recognition accuracy under varying illumination conditions.

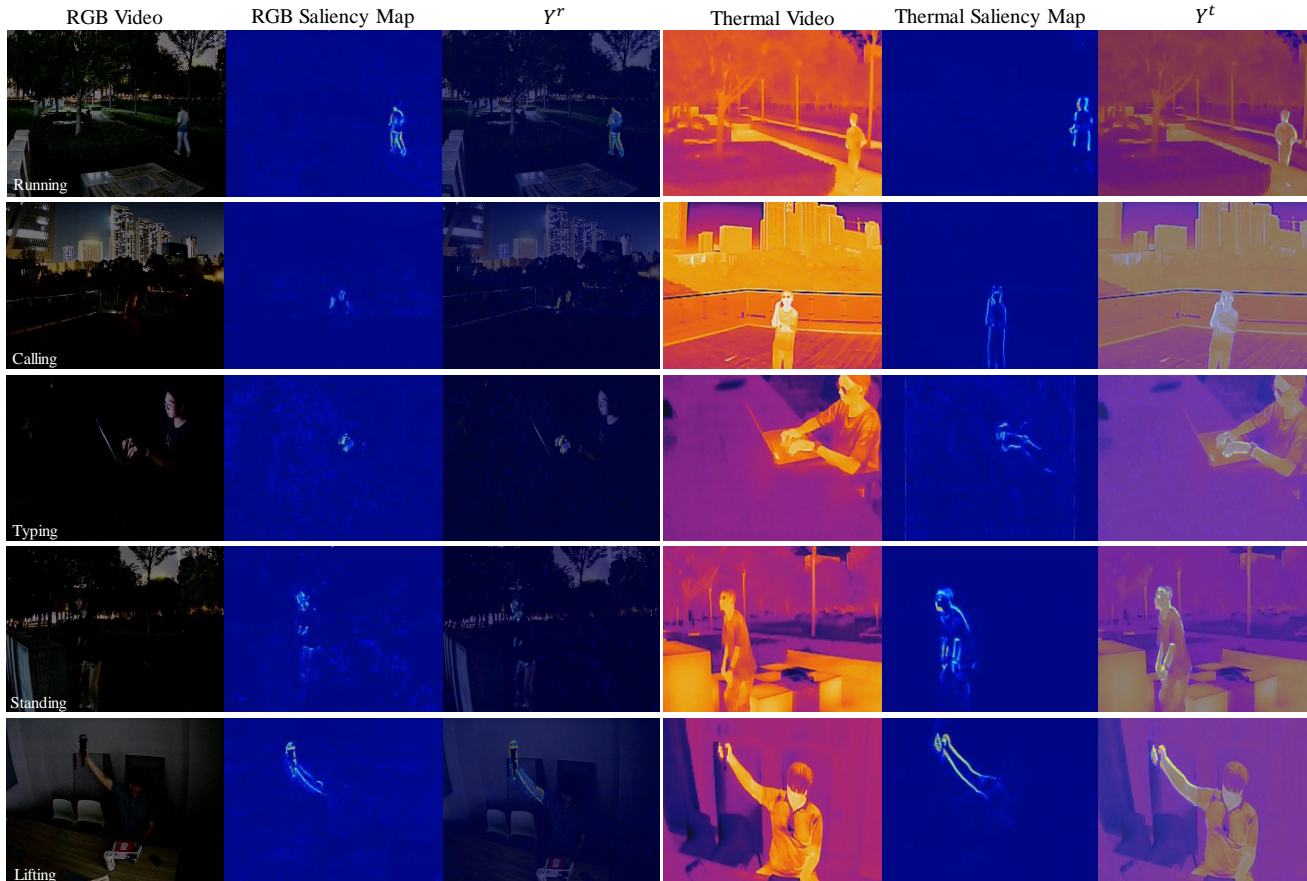

Figure A1. Visualization of the MAA module on paired RGB–thermal videos. For each modality, we show (left to right): the input frame, the temporal saliency map, and the motion-enhanced feature  $Y^r$  or  $Y^t$ .

### 9.3. Confusion matrix analysis

The confusion matrix provides a detailed view of how different models misclassify visually similar or motion-related action categories, offering deeper insight beyond aggregate Top-1/Top-5 metrics.

To further analyze recognition behavior on the 27 DarkAct classes, we present confusion matrices for several state-of-the-art methods. Specifically, we select the best-performing models from Table 2 of the main manuscript, including: (1) multimodal methods including DarkAct-Net, MRFS, and CMX; and (2) unimodal methods including MViT, OverLoCK, and ConvNeXt, evaluated separately on RGB and thermal inputs.

Figure A2 compares the confusion matrices of these models. DarkAct-Net exhibits a substantially stronger diagonal response, indicating more confident and accurate predictions across most categories. In the off-diagonal regions, DarkAct-Net consistently produces lower values, demonstrating fewer cross-class confusions. These improvements are particularly notable for actions that are highly ambigu-

ous in low-light environments (e.g., *taking off coat*), where RGB-only or thermal-only models struggle. Overall, the confusion matrices highlight the effectiveness of DarkAct-Net’s multimodal design for more reliable recognition under challenging low-light conditions.

### 10. More Examples of DarkAct

To further illustrate the diversity and visual characteristics of the DarkAct dataset, we present additional video frame samples for all 27 action categories at the end of this appendix. These examples highlight variations in illumination levels, human–camera distances, viewpoints, and scene contexts across both RGB and thermal modalities. The expanded set of visual examples provides a more comprehensive overview of the challenges presented by DarkAct and demonstrates the richness of cross-spectral cues available for low-light action recognition.

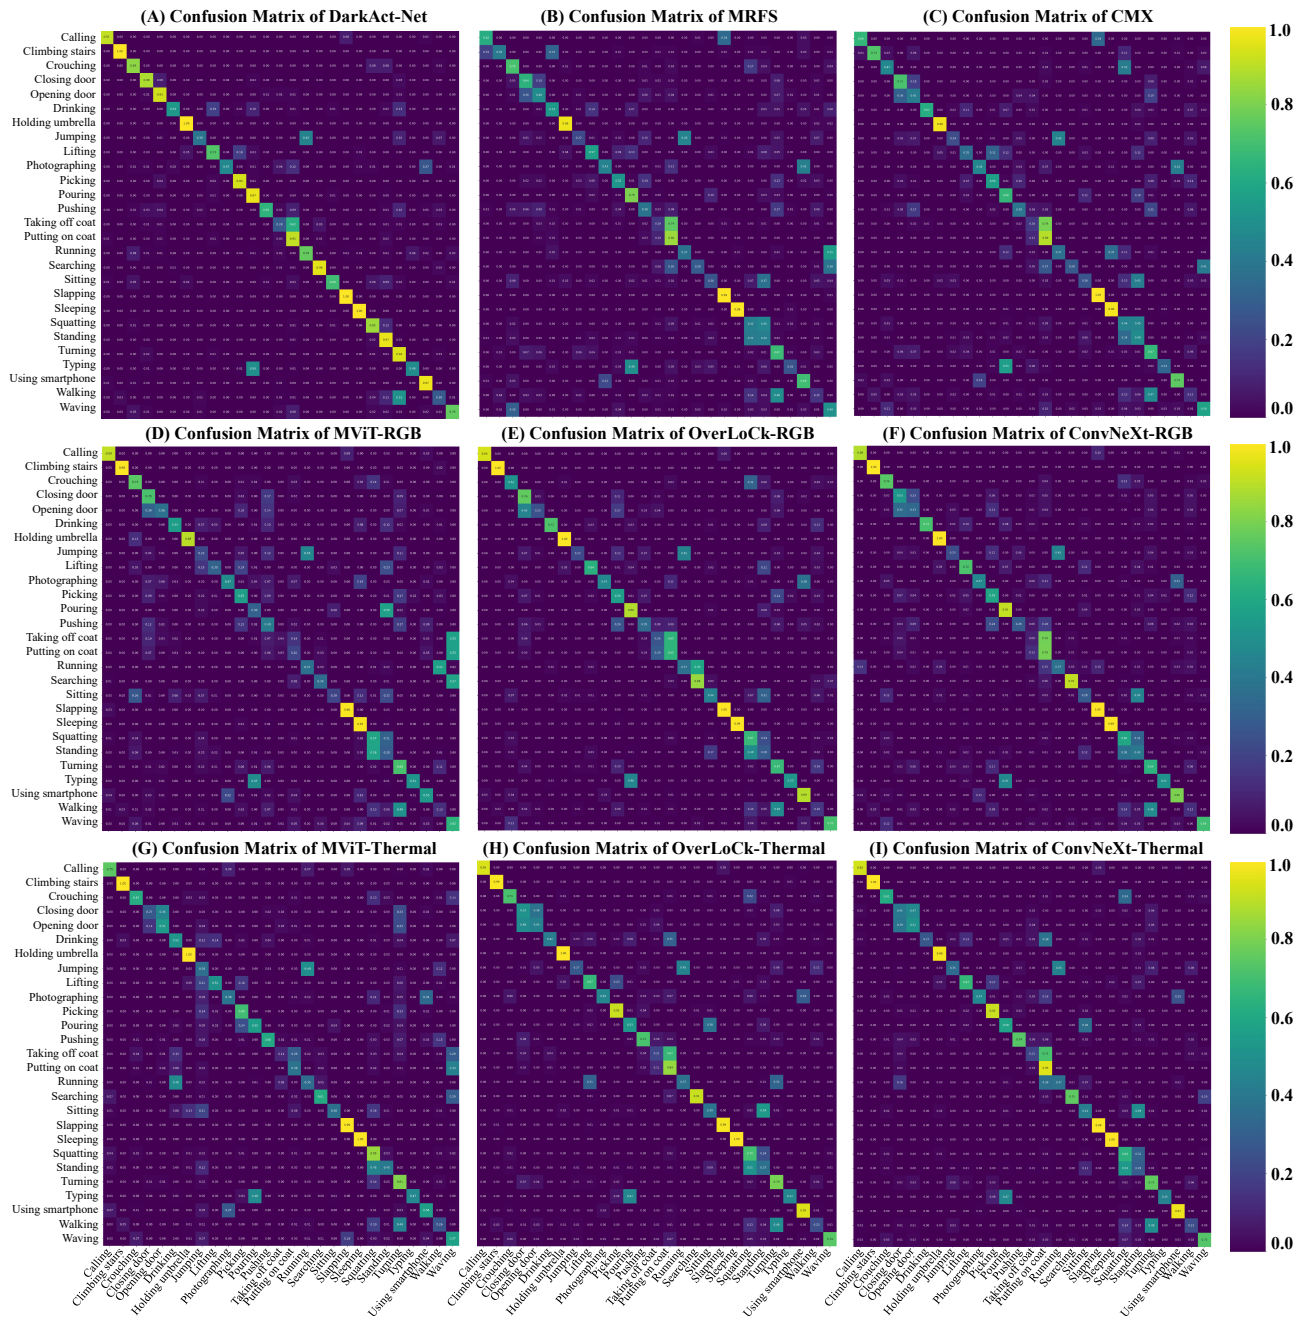

Figure A2. Comparison of confusion matrices for state-of-the-art unimodal and multimodal models on the 27-class DarkAct dataset.

Calling

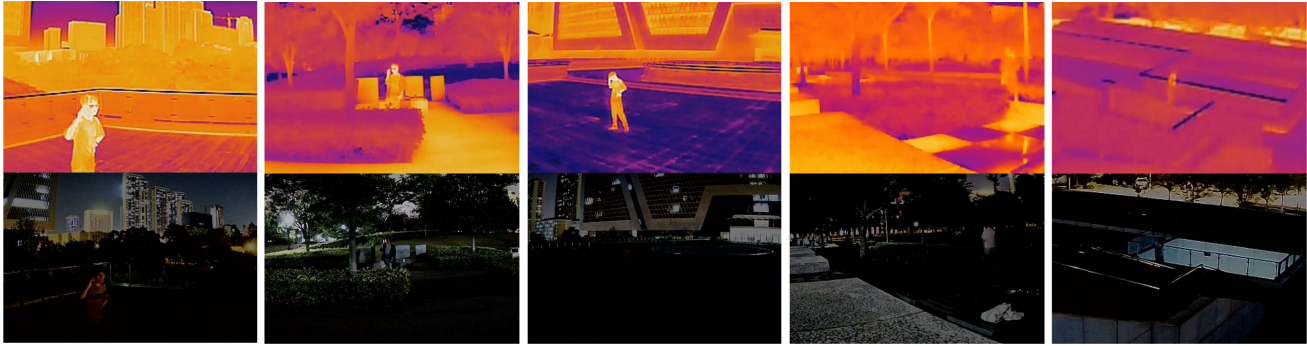

Climbing stairs

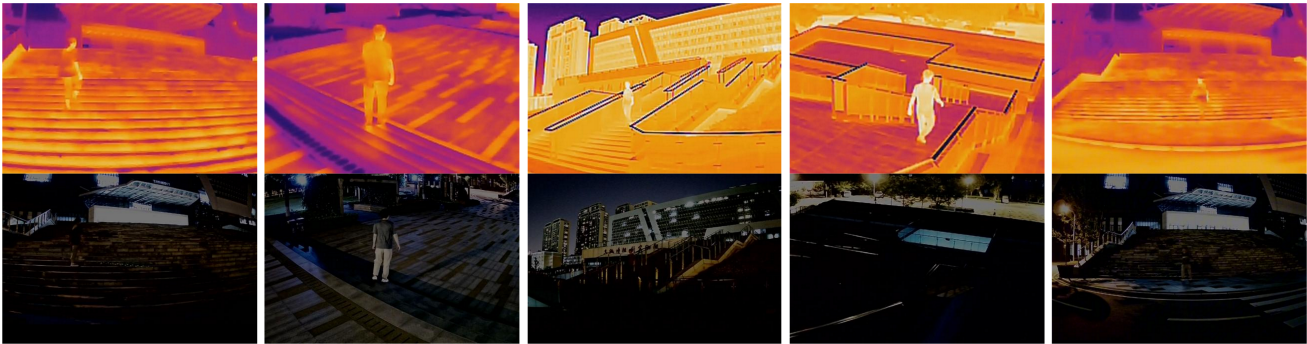

Crouching

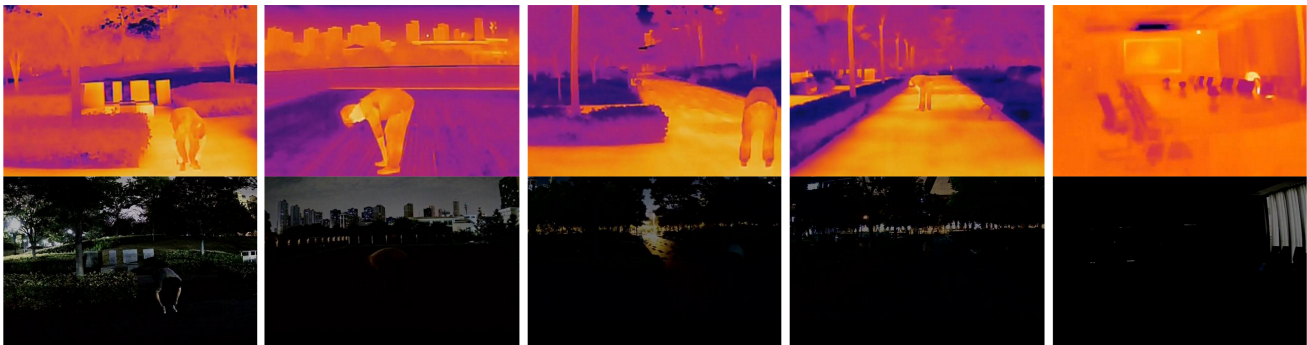

Closing door

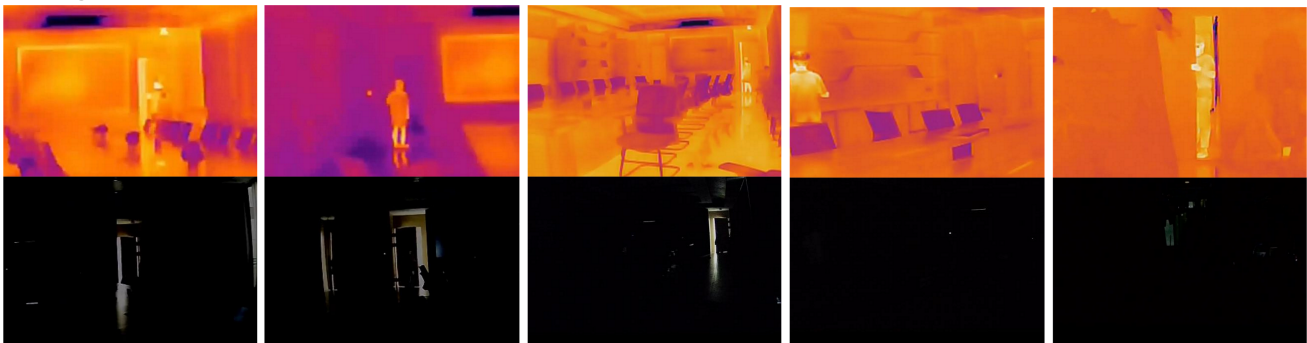

Opening door

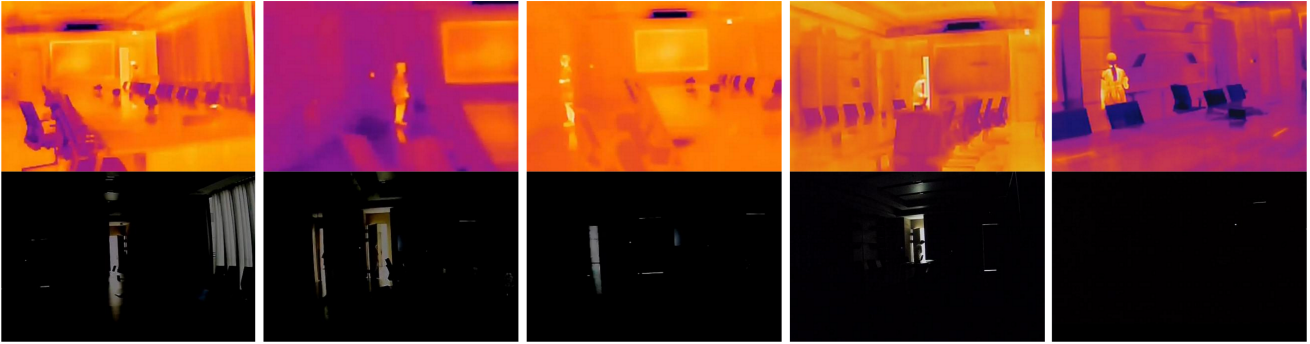

Drinking

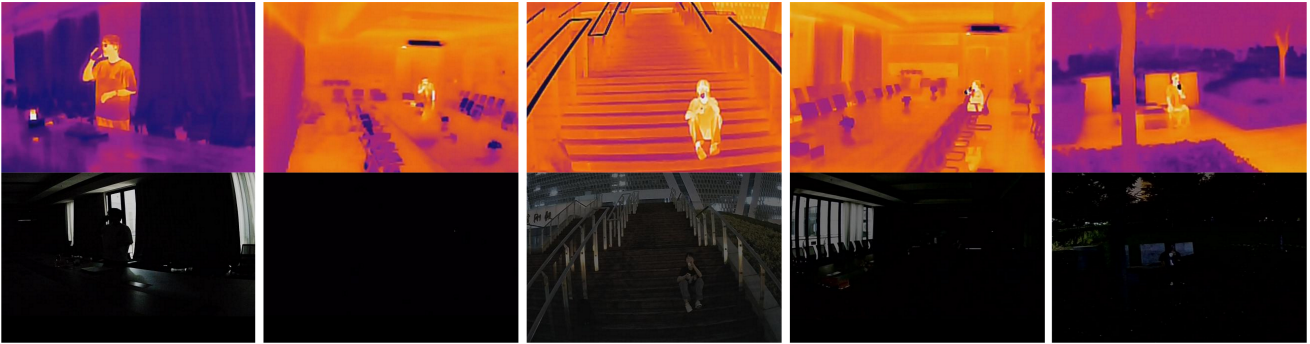

Holding umbrella

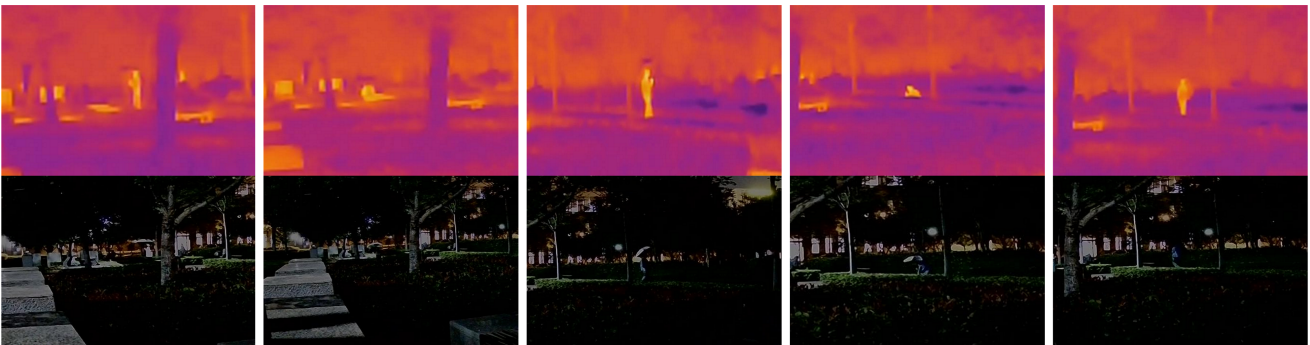

Jumping

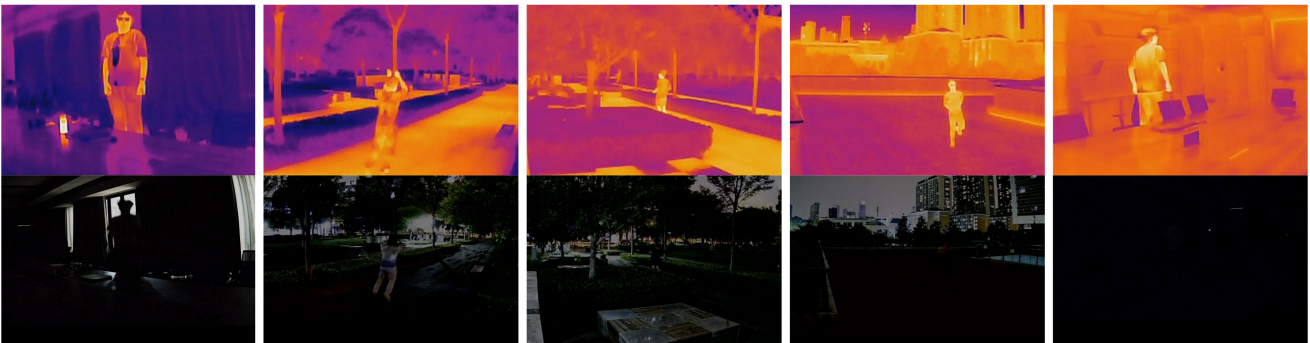

Lifting

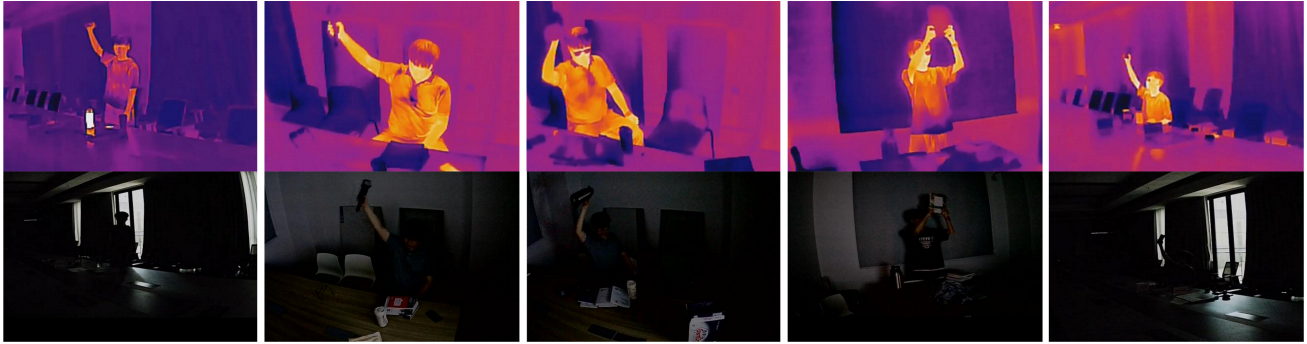

Photographing

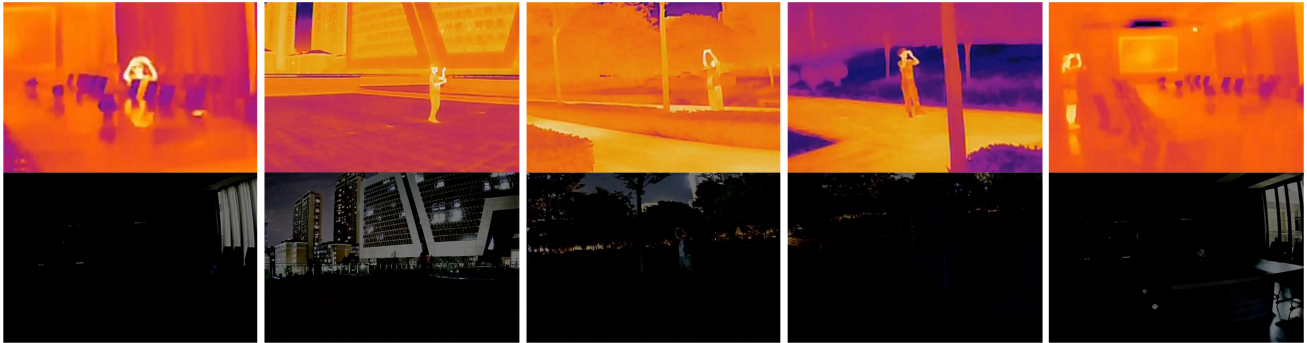

Picking

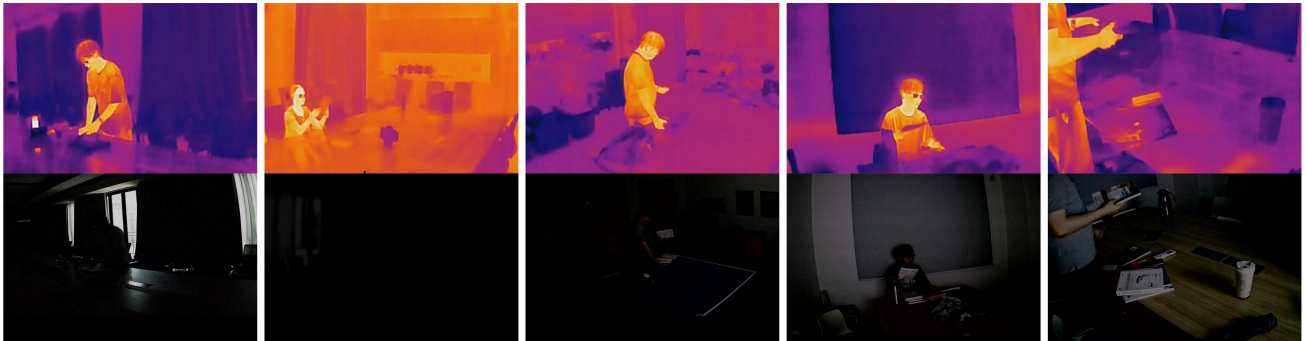

Pouring

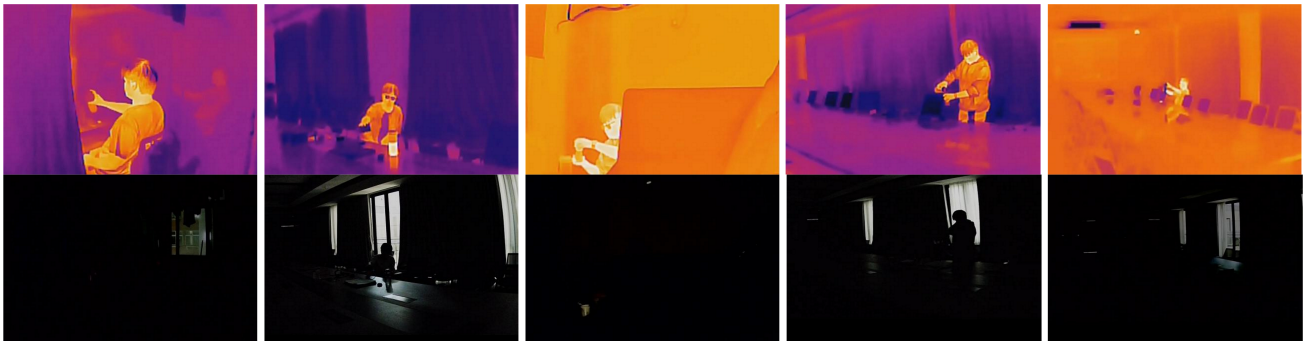

Pushing

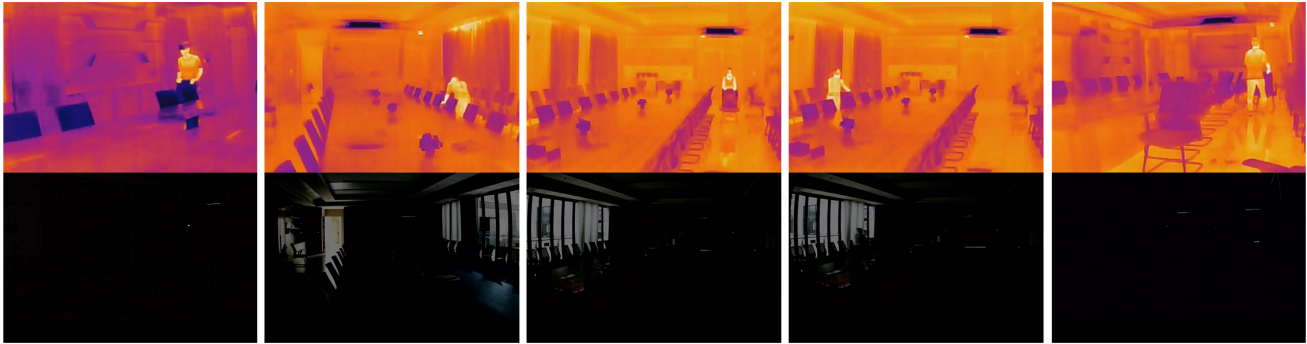

Taking off coat

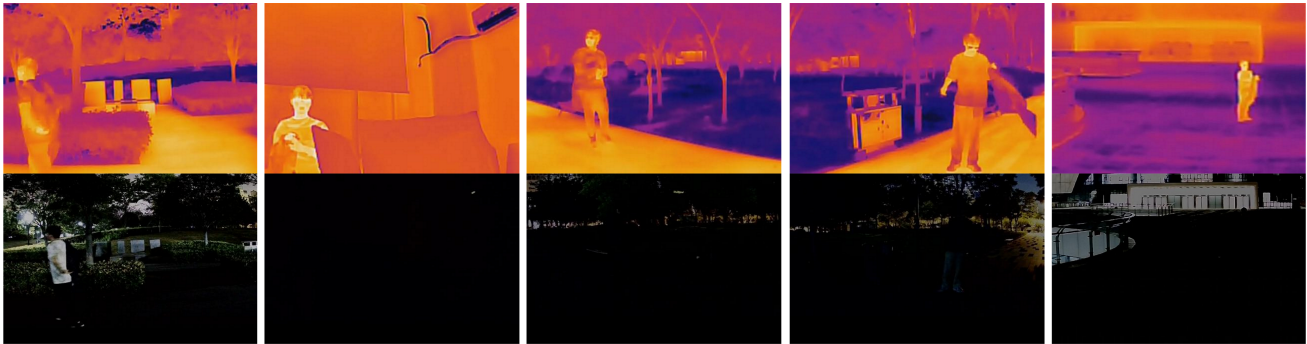

Putting on coat

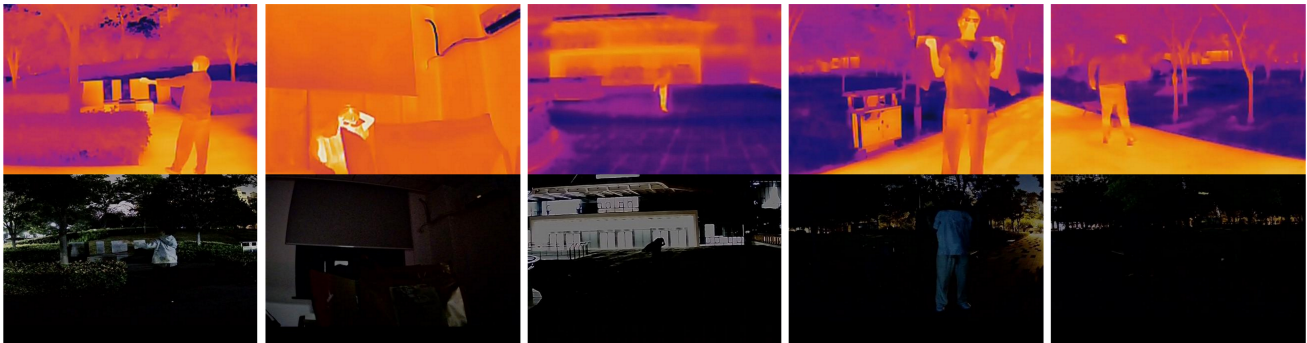

Running

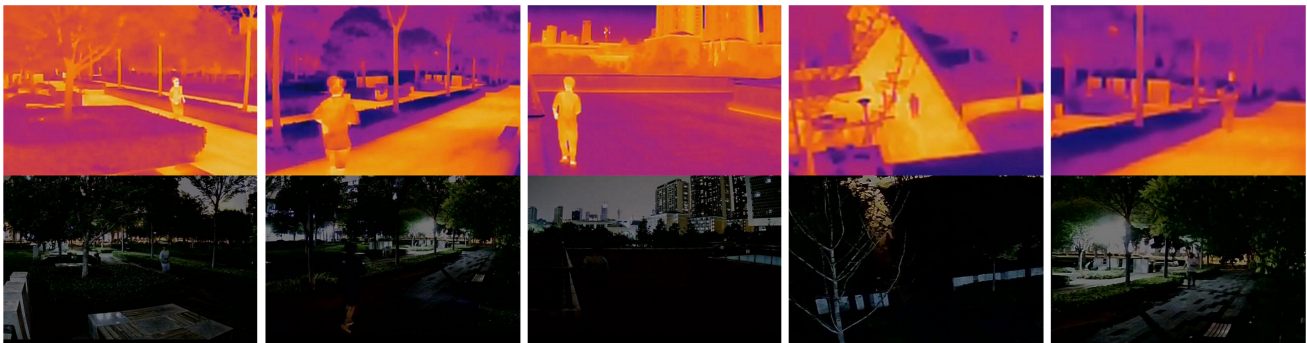

Searching

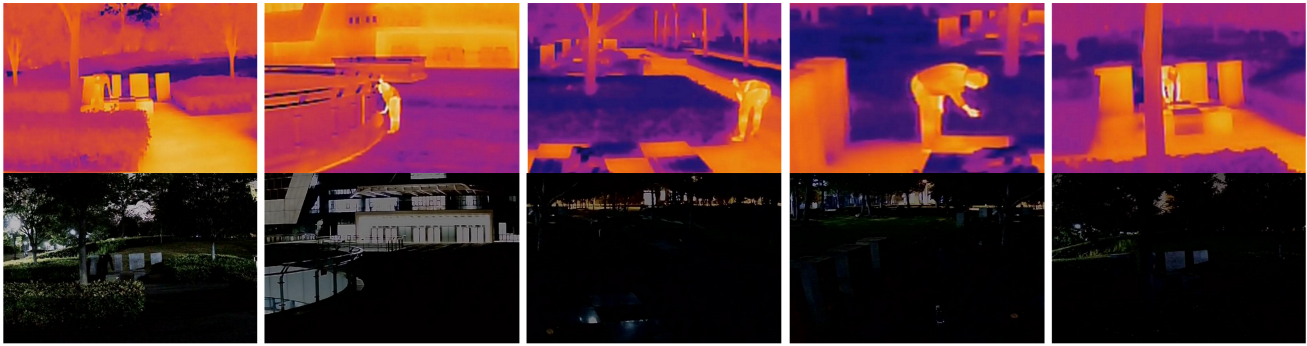

Sitting

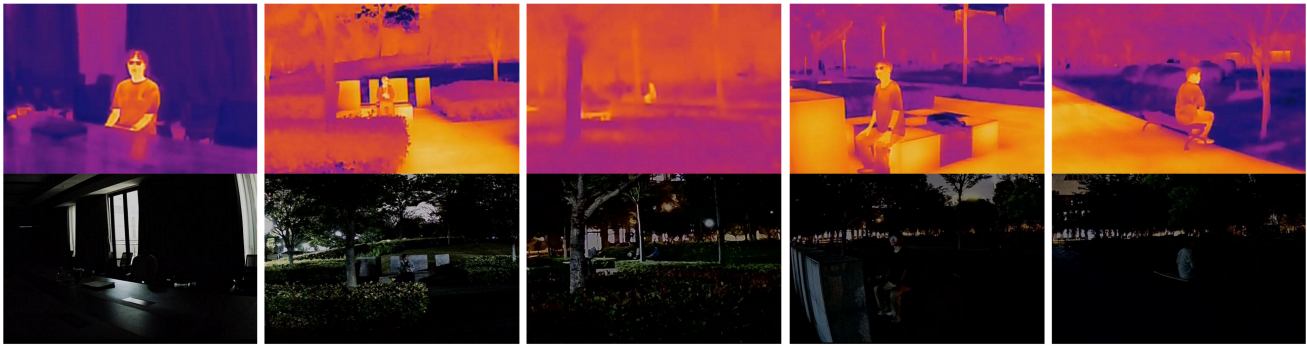

Slapping

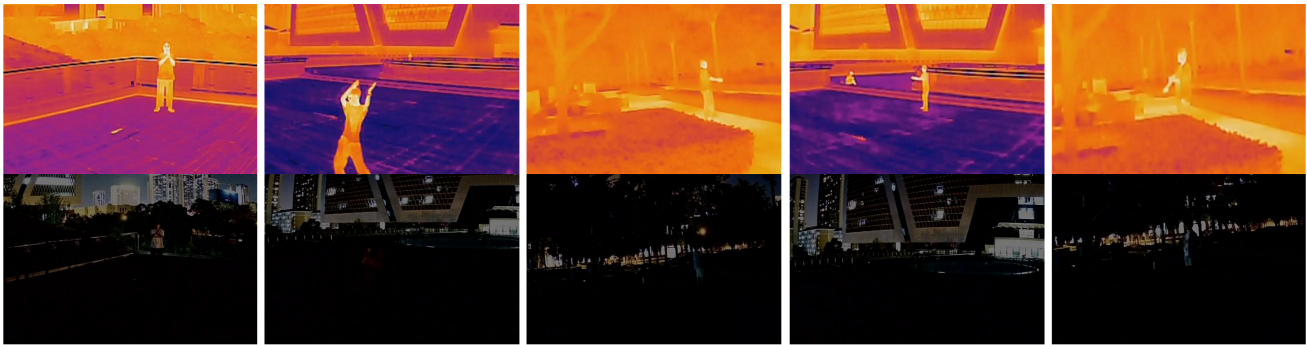

Sleeping

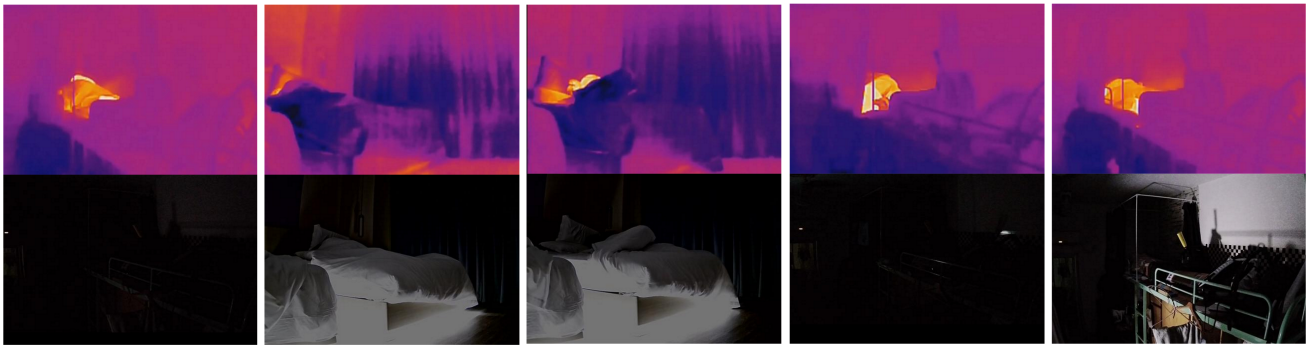

Squatting

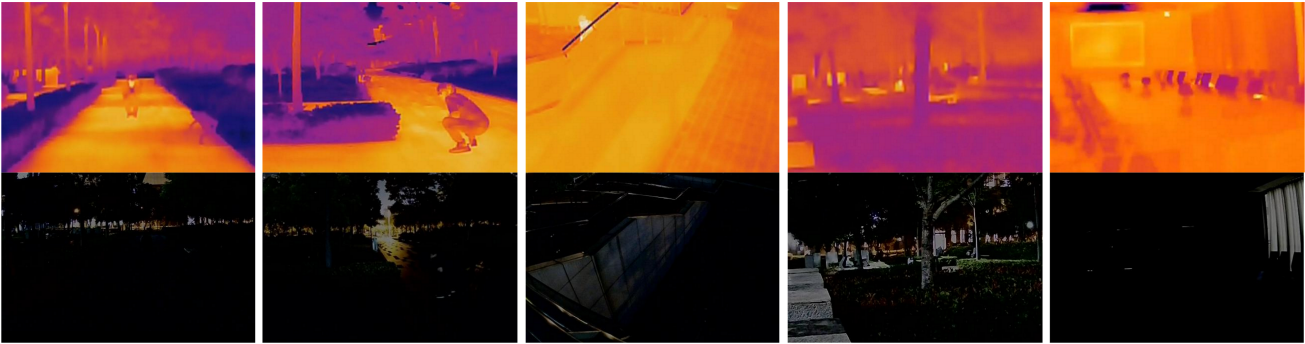

Standing

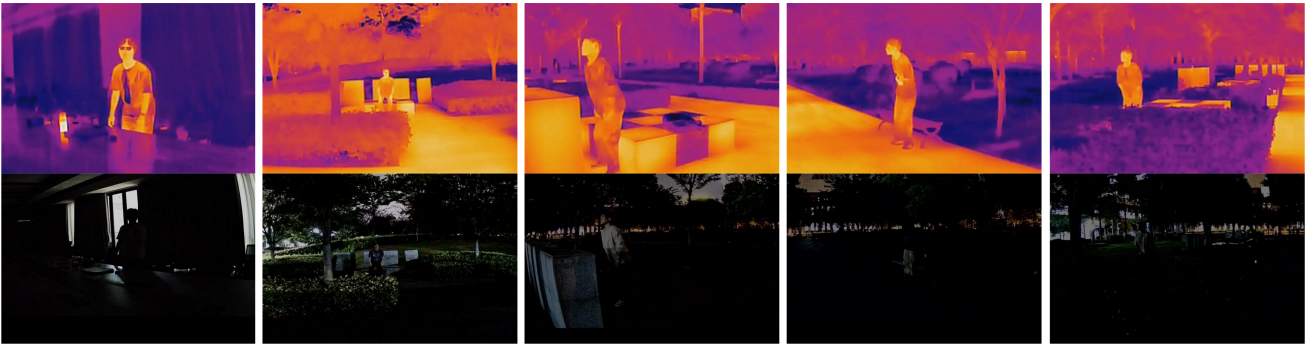

Turning

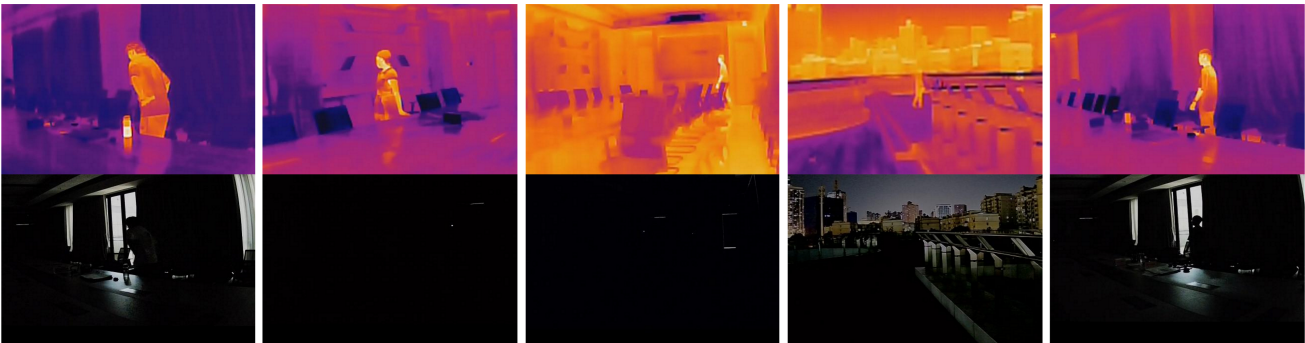

Typing

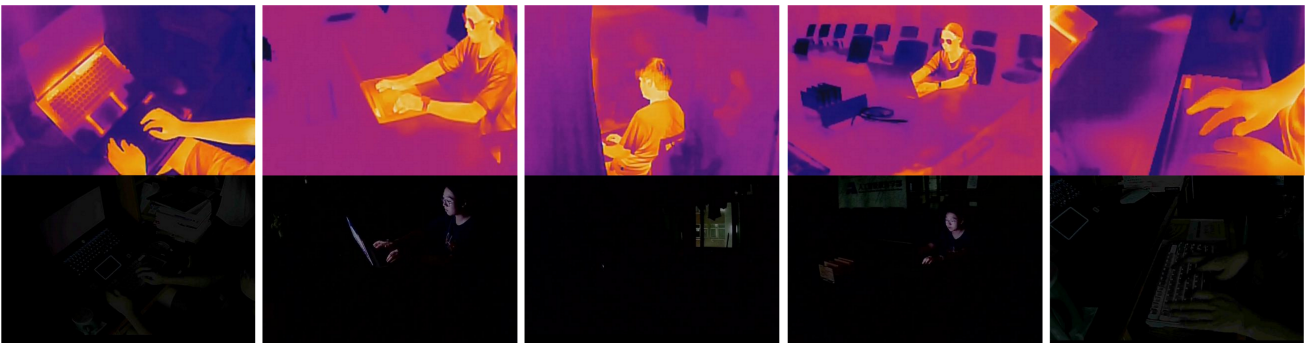

Using smartphone

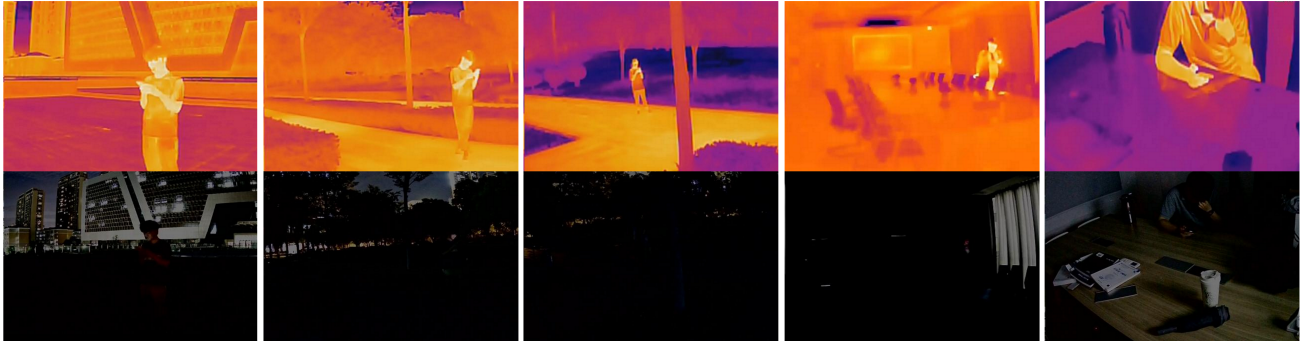

Walking

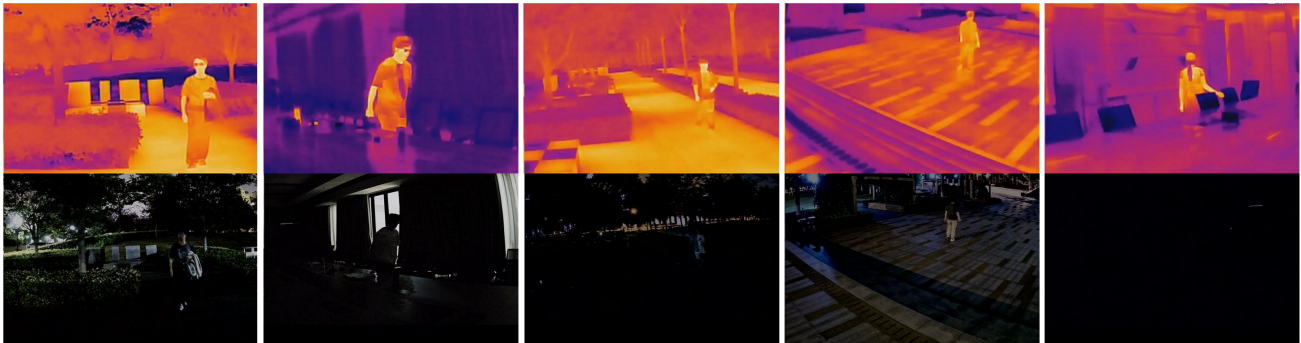

Waving

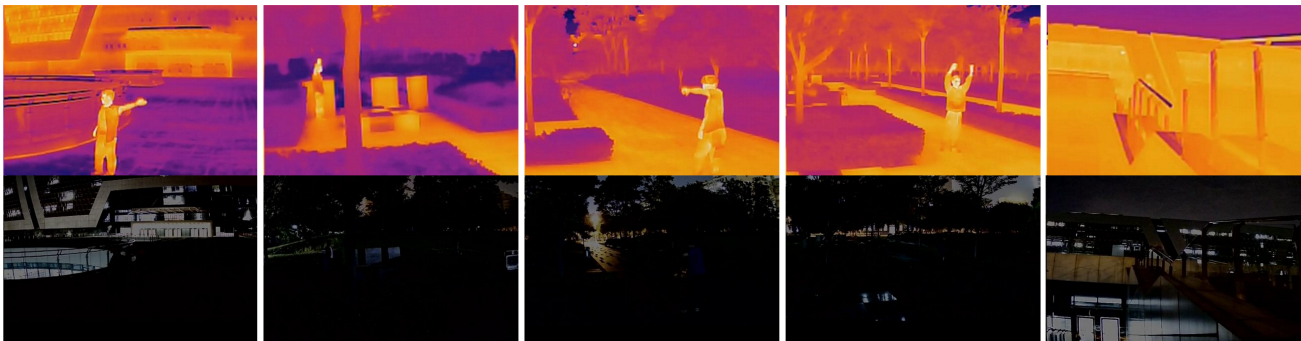

Supplement: Supplementary file 1 [file Tan_DarkAct_A_RGB-Thermal_CVPR_2026_supplemental.pdf]
